# Supplementary material
Source: PubMed Central journal article supplement (PMC7477938)
Supplement: NIHMS1559460-supplement-1.pdf [file NIHMS1559460-supplement-1.pdf]

## SUPPLEMENTAL MATERIAL

**Supplemental Table.** Non-fatal first-time CV events among subtypes AD, IMH, and PAU versus matched population referents (not adjusted for the Charlson Comorbidity Index due to low event rates in subgroups).

| <b>Aortic dissection (n=77)</b>   |                           |                           |                     |          |                                   |                           |                     |          |
|-----------------------------------|---------------------------|---------------------------|---------------------|----------|-----------------------------------|---------------------------|---------------------|----------|
|                                   | <b>All CV events</b>      |                           |                     |          | <b>Excluding acute CV events*</b> |                           |                     |          |
|                                   | <b>AD</b>                 | <b>Referents</b>          | <b>HR (95% CI)</b>  | <b>p</b> | <b>AD</b>                         | <b>Referents</b>          | <b>HR (95% CI)</b>  | <b>p</b> |
|                                   | <b>No. at risk/events</b> | <b>No. at risk/events</b> |                     |          | <b>No. at risk/events</b>         | <b>No. at risk/events</b> |                     |          |
| <b>Any CV event</b>               | 59 / 26                   | 153 / 28                  | 3.9 (2.3 – 6.8)     | <.001    | 42 / 19                           | 114 / 22                  | 3.0 (1.6 – 5.6)     | <.001    |
| <b>MI</b>                         | 71 / 3                    | 205 / 12                  | 0.99 (0.3 – 3.6)    | .984     | 57 / 0                            | 165 / 8                   | No events           | .811     |
| <b>HF</b>                         | 68 / 20                   | 195 / 30                  | 3.2 (1.8 – 5.7)     | <.001    | 53 / 17                           | 154 / 22                  | 3.0 (1.6 – 5.6)     | <.001    |
| <b>Stroke</b>                     | 72 / 9                    | 201 / 12                  | 2.8 (1.2 – 6.7)     | .021     | 57 / 5                            | 160 / 9                   | 1.8 (0.6 – 5.5)     | .283     |
| <b>Intramural hematoma (n=21)</b> |                           |                           |                     |          |                                   |                           |                     |          |
|                                   | <b>All CV events</b>      |                           |                     |          | <b>Excluding acute CV events*</b> |                           |                     |          |
|                                   | <b>IMH</b>                | <b>Referents</b>          | <b>HR (95% CI)</b>  | <b>p</b> | <b>IMH</b>                        | <b>Referents</b>          | <b>HR (95% CI)</b>  | <b>p</b> |
|                                   | <b>No. at risk/events</b> | <b>No. at risk/events</b> |                     |          | <b>No. at risk/events</b>         | <b>No. at risk/events</b> |                     |          |
| <b>Any CV event</b>               | 15 / 4                    | 34 / 7                    | 2.2 (0.6 – 8.2)     | .221     | 13 / 2                            | 28 / 4                    | 2.9 (0.5 – 17.5)    | .257     |
| <b>MI</b>                         | 18 / 2                    | 51 / 0                    | 27.2 (0.5 – 1500.5) | .106     | 17 / 2                            | 48 / 0                    | 27.2 (0.5 – 1500.5) | .106     |
| <b>HF</b>                         | 20 / 6                    | 54 / 5                    | 4.3 (1.3 – 14.4)    | .019     | 17 / 4                            | 45 / 3                    | 5.9 (1.2 – 30.0)    | .031     |
| <b>Stroke</b>                     | 17 / 0                    | 45 / 3                    | 0.7 (0.02 – 33.0)   | .872     | 17 / 0                            | 45 / 3                    | 0.7 (0.02 – 33.0)   | .872     |

**Penetrating aortic ulcer (n=35)**

|                     | All CV events             |                                 |                   |      | Excluding acute CV events* |                                 |                   |      |
|---------------------|---------------------------|---------------------------------|-------------------|------|----------------------------|---------------------------------|-------------------|------|
|                     | PAU<br>No. at risk/events | Referents<br>No. at risk/events | HR (95% CI)       | p    | PAU<br>No. at risk/events  | Referents<br>No. at risk/events | HR (95% CI)       | p    |
| <b>Any CV event</b> | 26 / 6                    | 65 / 8                          | 2.7 (0.9 – 8.1)   | .066 | 25 / 6                     | 64 / 7                          | 3.0 (0.99 – 9.0)  | .053 |
| <b>MI</b>           | 31 / 2                    | 87 / 2                          | 3.8 (0.5 – 28.9)  | .191 | 29 / 2                     | 82 / 2                          | 3.7 (0.5 – 28.0)  | .202 |
| <b>HF</b>           | 29 / 6                    | 79 / 9                          | 2.5 (0.9 – 7.2)   | .082 | 28 / 6                     | 78 / 9                          | 2.5 (0.9 – 7.1)   | .088 |
| <b>Stroke</b>       | 33 / 0                    | 94 / 3                          | 0.5 (0.02 – 18.4) | .739 | 31 / 0                     | 89 / 2                          | 0.6 (0.02 – 26.8) | .809 |

\*Including deaths >14 days of diagnosis only
